1 **Complete chloroplast genomes of *Anthurium huixtlense* and *Pothos scandens***  
2 **(Pothoideae, Araceae): unique inverted repeat expansion and contraction affect rate of**  
3 **evolution**

4 Abdullah<sup>1,\*</sup>, Claudia L. Henriquez<sup>2</sup>, Furrukh Mehmood<sup>1</sup>, Monica M. Carlsen<sup>3</sup>, Madiha  
5 Islam<sup>4</sup>, Mohammad Tahir Waheed<sup>1</sup>, Peter Poczai<sup>5</sup>, Thomas B. Croat<sup>4</sup>, Ibrar Ahmed<sup>\*,6</sup>

6 <sup>1</sup>*Department of Biochemistry, Faculty of Biological Sciences, Quaid-i-Azam University,*  
7 *45320, Islamabad, Pakistan*

8 <sup>2</sup>*University of California, Los Angeles, Department of Ecology and Evolutionary Biology*

9 <sup>3</sup>*Missouri Botanical Garden, St. Louis, MO*

10 <sup>4</sup>*Department of Genetics, Hazara University, Mansehra, Pakistan*

11 <sup>5</sup>*Finnish Museum of Natural History, University of Helsinki, PO Box 7 FI-00014 Helsinki*  
12 *Finland*

13 <sup>6</sup>*Alpha Genomics Private Limited, Islamabad, 45710, Pakistan*

14 *\*corresponding author:*

15 Ibrar Ahmed ([iaqureshi\\_qau@yahoo.com](mailto:iaqureshi_qau@yahoo.com))

16 Abdullah ([abd.ullah@bs.qau.edu.pk](mailto:abd.ullah@bs.qau.edu.pk))

17

18 **Abstract**

19 The subfamily Pothoideae belongs to the ecologically important plant family Araceae. Here,  
20 we report the chloroplast genomes of two species of the subfamily Pothoideae: *Anthurium*  
21 *huixtlense* (163,116 bp) and *Pothos scandens* (164,719 bp). The chloroplast genome of *P.*  
22 *scandens* showed unique inverted repeats (IRs) contraction and expansion, which increases  
23 the size of the large single copy (102,956) region and decreases the size of the small single-  
24 copy (6779 bp) region. This led to duplication of many single-copy genes due to transfer to  
25 IR regions from the small single-copy (SSC) region, whereas some duplicate genes became  
26 single copy due to transfer to large single-copy regions. The rate of evolution of protein-  
27 coding genes was affected by the contraction and expansion of IRs; we found higher mutation  
28 rates for genes that exist in single-copy regions as opposed to IRs. We found a 2.3-fold  
29 increase of oligonucleotide repeats in *P. scandens* when compared with *A. huixtlense*,  
30 whereas amino acid frequency and codon usage revealed similarities. We recorded higher  
31 transition substitutions than transversion substitutions. The transition/transversion ratio was  
32 2.26 in *P. scandens* and 2.12 in *A. huixtlense*. We also found a higher rate of transversion  
33 substitutions linked with non-synonymous substitutions than synonymous substitutions. The  
34 phylogenetic inference of the limited species showed the monophyly of the Araceae  
35 subfamilies. Our study provides insight into the molecular evolution of chloroplast genomes  
36 in the subfamily Pothoideae and family Araceae.

37 **Key words:**

38 Araceae, Pothoideae, *Pothos*, *Anthurium*, Inverted repeat contraction and expansion, Gene  
39 rearrangement, Gene evolution

40

## 41 **1. Introduction**

42 The plant family Araceae belongs to the order Alismatales. Araceae is a large and ancient  
43 monocot family and consists of 114 genera and 3750 species (Christenhusz and Byng 2016),  
44 although Boyce and Croat (2018) have estimated approximately 6500 species. It is the most  
45 diverse monocotyledon family in terms of morphology (Gunawardena and Dengler 2006) and  
46 ecological distribution (Cabrera et al. 2008). Species of Araceae have been subdivided into  
47 eight subfamilies and exist in tropical and temperate regions (Cabrera et al. 2008; Cusimano  
48 et al. 2011; Nauheimer et al. 2012). Pothoideae is the second largest subfamily, with  
49 approximately 1010 described species and approximately 2072 estimated species (Boyce and  
50 Croat 2018) in four genera, including *Pothos* L., *Pothoidium* Schott, *Pedicellarum* M.Hotta,  
51 and *Anthurium* Schott (Cabrera et al. 2008). The largest genera are *Pothos* and *Anthurium*,  
52 with approximately 57 and 950 described species and approximately 70 and 2000 estimated  
53 species, respectively (Boyce and Croat 2018). The other two genera, *Pothoidium* and  
54 *Pedicellarum*, are monospecific.

55 The chloroplast is a self-replicating organelle that plays a vital role in photosynthesis and in  
56 the synthesis of fatty acids and amino acids (Cooper 2000). In most plant lineages, the  
57 chloroplast contains its own circular double-stranded genome and has a primarily  
58 quadripartite structure in which a pair of long inverted repeat regions (IRa and IRb) separate  
59 the large single-copy (LSC) and small single-copy (SSC) regions (Palmer 1985). However,  
60 linear chloroplast genomes have also been reported (Oldenburg and Bendich 2016) in some  
61 species. Moreover, a quadripartite structure has not been observed in the chloroplast genomes  
62 of various species, such as Pinaceae (Wu et al. 2011), Cephalotaxaceae (Yi et al. 2013), and  
63 Taxodiaceae (Hirao et al. 2008). The size of the chloroplast genome of photosynthetic plants  
64 varies from 107 kb (*Cathaya argyrophylla* Chun & Kuang) to 218 kb (*Pelargonium x*  
65 *hortorum* L.H.Bailey) (Daniell et al. 2016). Chloroplast genomes are inherited from a single  
66 parent and show significant polymorphism (Daniell 2007; Daniell et al. 2016), which makes  
67 them well-suited for studies on phylogenetics and population genetics (Ahmed et al. 2013;  
68 Ahmed 2014; Henriquez et al. 2014).

69 Despite a relatively conserved structure, including gene organization, gene content, and  
70 intron content within genes (Iram et al. 2019; Mehmood et al. 2020; Shahzadi et al. 2020),  
71 chloroplast genomes have also undergone gene loss, intron loss, gene rearrangement,  
72 pseudogenization, gene duplication, and uneven expansion and contraction of IR regions.  
73 These events have led to a variable number of genes in the chloroplast genomes of

74 angiosperms (Menezes et al. 2018; Abdullah et al. 2020; Henriquez et al. 2020a). Moreover,  
75 the shifting of genes to single-copy regions from IR or vice versa due to IR contraction and  
76 expansion also affect the rate of DNA sequence evolution. The phenomenon is known as rate  
77 heterotachy (Lockhart et al. 2006). Previous studies of subfamilies Lemnoideae and Aroideae  
78 revealed unique and uneven contraction and expansion of IR regions, which led to a variable  
79 number of genes and gene rearrangements in the chloroplast genomes of several of their  
80 respective taxa (Wang and Messing 2011; Choi et al. 2017; Kim et al. 2019; Henriquez et al.  
81 2020a). The aforementioned studies did not include species of the subfamily Pothoideae.

82 In this study, a comparison of the *de novo* assembled chloroplast genomes of *A. huixtlense*  
83 Matuda and *P. scandens* L. with chloroplast genomes of other Araceae species confirmed  
84 unique events of IR contraction and expansion in the chloroplast genome of *P. scandens*. The  
85 results reveal the transfer of IR genes to the LSC region at the junction of JLB (LSC/IRb) and  
86 the transfer of SSC genes (except *rps15* and *ycf1*) to the IR region at the junction of JSB  
87 (IRb/SSC). This transfer promotes heterotachy in Pothoideae by affecting the rate of  
88 evolution of these genes. To the best of our knowledge, this shortening of the SSC region due  
89 to unique IR contraction and expansion and the effects on gene evolution rate are reported  
90 here in Araceae for the first time. These results improve our understanding of the evolution of  
91 chloroplast genomes in Araceae.

## 92 **2. Materials and Methods**

### 93 **2.1 DNA extraction and sequencing**

94 We collected fresh healthy leaves of *P. scandens* and *A. huixtlense* from the Aroid  
95 Greenhouse at the Missouri Botanical Garden in St. Louis, Missouri. Total genomic DNA  
96 was extracted from these leaves using a Qiagen DNeasy Minikit (Qiagen, Germantown,  
97 Maryland, USA) following Henriquez et al. (2020a). Confirmation of the quality and quantity  
98 of DNA was performed using 1% gel electrophoresis and Nanodrop (ThermoScientific,  
99 Delaware, USA). Library preparation and sequencing were performed using TruSeq kits  
100 (Illumina, Inc., San Diego, California) in the Pires lab at the University of Missouri,  
101 Columbia following Henriquez et al. (2020a).

### 102 **2.2 *De novo* assembly and annotation**

103 The quality of raw reads was analyzed by FastQC (Andrews 2017) and MultiQC (Ewels et al.  
104 2016) for comparison. After quality confirmation, the Fast-Plast v. 1.2.2 pipeline

105 (<https://github.com/mrmckain/Fast-Plast>) was initially used to assemble the raw reads  
106 following similar parameters previously employed for the assembly of chloroplast genomes  
107 of subfamilies Aroideae and Monsteroideae (Henriquez et al. 2020b, a). The resulting  
108 assembly from Fast-Plast was further confirmed by *de novo* assembly using Velvet v.1.2.10  
109 following Abdullah et al. (2019a, 2020) using Kmer values of 61, 71, and 81. Validation and  
110 coverage depth analyses of *de novo* assembled genomes were performed by mapping short  
111 reads to their respective assembled chloroplast genomes. The assembled chloroplast genomes  
112 were annotated using GeSeq (Tillich et al. 2017) and the circular diagrams of the annotated  
113 genomes were drawn using OrganellarGenomeDRAW (OGDRAW v.13.1) (Greiner et al.  
114 2019). The five-column tab-delimited tables were generated for *de novo* assembled  
115 chloroplast genomes using GB2sequin (Lehwark and Greiner 2019) and were submitted to  
116 the National Center for Biotechnology Information (NCBI) under accession number  
117 MN046891 (*P. scandens*) and MN996266 (*A. huixtlense*). The raw reads were also submitted  
118 to the sequence read archive (SRA) of NCBI under BioProject number PRJNA547619.

### 119 **2.3 Characterization and comparative analyses of chloroplast genomes**

120 Characterization of the chloroplast genomes of *P. scandens* and *A. huixtlense* and analyses of  
121 amino acid frequency and codon usage were performed in Geneious R8.1 (Kearse et al.  
122 2012). Oligonucleotide repeats were determined using REPuter (Kurtz et al. 2001) by setting  
123 the parameter of minimum repeat size  $\geq 30$  and with minimum repeat similarity of 90%.

124 The chloroplast genome structure and gene content of *P. scandens* and *A. huixtlense* were  
125 compared with eight previously reported chloroplast genomes, including *Anchomanes*  
126 *hookeri* (Kunth) Schott, *Anubias heterophylla* Engler, *Zantedeschia aethiopica* (L.) Spreng.  
127 (Henriquez et al. 2020a), *Epipremnum aureum* (Linden & André) G.S. Bunting (Tian et al.  
128 2018), *Spathiphyllum kochii* Engl. & K. Krause (Han et al. 2016), *Spirodela polyrrhiza* (L.)  
129 Schleid., *Wolffiella lingulata* Hegelm. (Wang and Messing 2011), and *Symplocarpus*  
130 *renifolius* Schott ex Tzvelev (Choi et al. 2017). The gene content and rearrangement of the  
131 genome were compared by integrated Mauve alignment (Darling et al. 2004) in Geneious  
132 R8.1 based on collinear blocks analyses. IR contraction and expansion were studied among  
133 these species using IRscope (Amiryousefi et al. 2018a).

134 We also analyzed synonymous ( $K_s$ ) and non-synonymous ( $K_a$ ) substitutions and their ratio  
135 ( $K_a/K_s$ ). *Symplocarpus renifolius*, a species from the early diverging subfamily Orontioideae,  
136 was used as a reference and 75 protein-coding genes of *P. scandens* and *A. huixtlense* were

137 aligned to the protein-coding genes of *Symplocarpus renifolius* by MAFFT alignment (Kato  
138 et al. 2005). These alignments were analyzed for the determination of  $K_s$  and  $K_a$  substitutions  
139 and  $K_a/K_s$  using DnaSP (Rozas et al. 2017) as in previous studies (Abdullah et al. 2019a,  
140 2020; Henriquez et al. 2020b). We also determined the extent of transition and transversion  
141 substitutions that linked with  $K_s$  and  $K_a$  substitutions. For this purpose, we selected 11 genes  
142 from the genome of *P. scandens* that had various  $K_a/K_s$  values and analyzed the extent of  
143 transition and transversion types of substitutions with  $K_s$  and  $K_a$  substitutions in Geneious  
144 R8.1 (Kearse et al. 2012) following Abdullah et al. (2019a).

145 We also used *Symplocarpus renifolius* as a reference to analyze the effect of rate heterotachy  
146 on the evolution of protein-coding genes. We considered genes of LSC, SSC, and IR of  
147 *Symplocarpus renifolius* and determined the rate of evolution of the respective genes in the  
148 chloroplast genomes of *P. scandens* and *A. huixtlense*. We also separately determined the rate  
149 of evolution of protein-coding genes that transferred from IRs to LSC or from SSC to IR to  
150 elucidate the changes in evolution rate. We concatenated genes of each region and aligned  
151 using MAFFT (Kato et al. 2005). The types of transition and transversion substitutions in *P.*  
152 *scandens* and *A. huixtlense* were also determined from the alignment of genes from LSC,  
153 SSC, and IR.

## 154 **2.4 Phylogenetic inference**

155 The phylogenetic tree was inferred using 26 species of Araceae, with *Acorus americanus*  
156 (Acoraceae) as the outgroup. The accession numbers of all included species are provided in  
157 Table S1. The complete chloroplast genomes, excluding IRa, were aligned by MAFFT  
158 (Kato et al. 2005) and the phylogeny was inferred using the IQ-tree program (Nguyen et al.  
159 2015; Kalyaanamoorthy et al. 2017; Hoang et al. 2018) with default parameters using a  
160 previous approach (Abdullah et al. 2019a, 2020).

## 161 **3. Results**

### 162 **3.1 Assembly and characterization of chloroplast genomes**

163 The sequencing of 100-bp single-end reads generated 3.69 GB data (14.13 million reads) for  
164 *A. huixtlense* and 5.8 GB data (22.2 million reads) for *P. scandens*. Whole-genome shotgun  
165 reads contained 0.22 million reads in *A. huixtlense* and 0.77 million reads of chloroplast  
166 origin in *P. scandens*. These chloroplast reads were used for *de novo* assembly and provided  
167 average coverage depths of 468× for *P. scandens* and 138× for *A. huixtlense*.

168 The sizes of the complete chloroplast genomes were 163,116 bp for *A. huixtlense* and  
169 164,719 bp for *P. scandens*. The sizes of the LSC and SSC regions showed a high level of  
170 variation between the two species due to unique IR contraction and expansion in the *P.*  
171 *scandens* chloroplast genome (Table 1). The GC content was highest in IR regions, followed  
172 by LSC and SSC regions. A high level of variation exists in the GC content of the chloroplast  
173 genome of both species.

174 We found 114 unique functional genes in both species, including 80 protein-coding genes, 30  
175 tRNA genes, and 4 rRNA genes (Fig. 1A and Fig. 1B). The *infA* gene was observed as a  
176 pseudogene in both species, whereas the *rpl23* gene was observed as pseudogene in *P.*  
177 *scandens* due to the generation of an internal stop codon. The total number of genes varied  
178 between the two species due to IR contraction and expansion. We found 130 genes in *A.*  
179 *huixtlense*, including 37 tRNA genes, 85 protein-coding genes, and 8 rRNA genes. We also  
180 observed 17 genes that were duplicated in the IR regions in *A. huixtlense*, including 7 tRNA  
181 genes (2 genes also contain introns), 4 rRNA genes, and 6 protein-coding genes (3 genes also  
182 contain introns) (Fig. 1A). In *P. scandens*, we found 135 genes due to expansion of the IR  
183 region, including 36 tRNA genes, 90 protein-coding genes, and 8 rRNA genes (Fig. 1B). We  
184 found 22 genes that were duplicated in the IR regions in *P. scandens*, including 6 tRNA  
185 genes (2 genes also contain introns), 4 rRNA genes, and 12 protein-coding genes (2 genes  
186 also contain introns) (Fig. 1B).

### 187 **3.2 Amino acid frequency and codon usage**

188 The highest frequency observed was for leucine followed by iso-leucine, whereas the lowest  
189 frequency observed was for cysteine (Fig. 2). Relative synonymous codon usage (RSCU)  
190 analyses revealed high encoding frequency for codons containing A or T at the 3' end and  
191 having an RSCU value of  $\geq 1$ , whereas low encoding frequency was observed for codons  
192 having C or G at the 3' and having RSCU  $< 1$  (Table S2).

### 193 **3.3 Repeats analyses**

194 REPuter detected four types of oligonucleotide repeats in the chloroplast genomes of *A.*  
195 *huixtlense* and *P. scandens*. The number of repeats and types varied in both species to a high  
196 degree. We observed 37 repeats in *A. huixtlense* and 85 repeats in *P. scandens*. We observed  
197 9 forward, 12 palindromic, 6 complementary, and 10 reverse repeats in *A. huixtlense*. In *P.*  
198 *scandens* we observed 21 forward, 33 palindromic, 8 complementary, and 23 reverse repeats  
199 (Fig. 3A). Most of the repeats were found in LSC regions instead of SSC and IR regions (Fig.

200 3B). Most of the repeats ranged in size from 40 bp to 44 bp in *A. huixtlense*. In *P. scandens*,  
201 most of the repeats varied in size from 35 bp to 39 bp (Fig. 3C). Details are provided in Table  
202 S3.

### 203 **Transition and transversion substitutions and evolution rate of protein-coding genes**

204 The evolution rate of protein-coding genes revealed strong purifying selection on these genes  
205 and that none of the genes are under positive selection pressure. Except for a few genes that  
206 showed neutral selection, all other genes showed purifying selection (Table S4) (average  $K_s$   
207 = 0.16,  $K_a$  = 0.026, and  $K_a/K_s$  = 0.18). As expected, the highest purifying selection pressure  
208 was observed for genes that are involved in photosynthesis.

209 In the protein-coding genes of *P. scandens*, we found 4061 substitutions. Of these, 2814  
210 contained transition substitutions (Ts) and 1247 contained transversion substitutions (Tv); the  
211 Ts/Tv ratio was 2.26. In *A. huixtlense*, we recorded 3960 substitutions, of which 2690 were  
212 Ts and 1270 were Tv (Ts/Tv = 2.12) (Table 2). These values revealed higher Ts than Tv.  
213 Examination of 11 protein-coding genes revealed a Ts/Tv of 2.79 for synonymous  
214 substitutions and a Ts/Tv of 1.43 for non-synonymous substitutions. Hence, a high number of  
215 Tv leads to non-synonymous substitutions as compared to Ts, which leads to synonymous  
216 substitutions.

### 217 **3.4 Gene rearrangement and inverted repeats contraction and expansion**

218 The genomes of Pothoideae show unique gene and structural rearrangements. The *P.*  
219 *scandens* chloroplast genome showed unique IR contraction and expansion, which led to a  
220 variable number of genes and also a change in gene arrangement. At the junction of JLB  
221 (LSC/IRb), the contraction of IR leads to expansion of the LSC region, whereas at the JSB  
222 (IRb/SSC) junction, the expansion of IR leads to contraction of the SSC region. Hence, many  
223 genes (*rpl2*, *rpl23*, *trnM*, *ycf2*, *trnL*, *ndhB*) that are usually duplicated in the IRs become  
224 single copy at the junction of JLB due to their transfer to LSC. In contrast, many genes  
225 (*ndhH*, *ndhA*, *ndhI*, *ndhG*, *ndhE*, *psaC*, *ndhD*, *ccsA*, *trnL*, *rpl32*, and *ndhF*) that usually exist  
226 as single copy due to their existence in SSC exist in duplicate due to their transfer to IR  
227 regions (Fig. 1). The arrangement of genes in LSC in both *A. huixtlense* and *P. scandens* did  
228 not change due to contraction of IR regions and gene arrangement was found to be similar to  
229 other species (*Spathiphyllum kochii*, *Epipremnum aureum*, *Symplocarpus renifolius*, and  
230 *Anubias heterophylla*), as shown in Colinear block of Mauve alignment (Fig. 4). However,  
231 the genes of the SSC region showed variation in gene arrangement (Fig. 4). In the genome of



232 *A. huixtlense*, the SSC was inverted when compared to other species of Aroideae. However,  
233 this could not be considered any important evolutionary events as chloroplast genome exist in  
234 two equimolar states and can be differed by orientation of SSC region (Walker et al. 2015).

235 The contraction and expansion of IR regions at the junctions JLB (LSC/IRb), JSB (IRb/SSC),  
236 JSA (SSC/Ira), and JLA (IRa/LSC) were analyzed among the species of Araceae. We  
237 observed five types of variation in the junctions (Fig. 5). Type A included *P. scandens*, type  
238 B included *A. huixtlense*, *Epipremnum aureum* (see below), *Spathiphyllum kochii*,  
239 *Symplocarpus renifolius*, and *Anubias heterophylla*, type C included *Wolffiella lingulata* and  
240 *Spirodela polyrhiza*, type D included *Zantedeschia aethiopica*, and Type E included  
241 *Anchomanes hookeri*. These results show that the *P. scandens* chloroplast genome displays a  
242 novel type of IR contraction and expansion.

### 243 **Effect of rate heterotachy**

244 We also analyzed the effect of IR contraction and expansion on the evolution of protein-  
245 coding genes. Our result showed that IR contraction and expansion affects the evolution rate  
246 of protein-coding genes. The genes that were transferred from the SSC region to IR regions  
247 showed a decrease in the rate of evolution, whereas genes that travel from IR regions to the  
248 LSC region showed an increase in the rate of evolution. In *P. scandens*, we found 2454  
249 (5.67%) substitutions in the genes of LSC, 269 substitutions (2.64%) in genes of IRs, and  
250 1338 (9.27%) substitutions in genes of SSC. In *A. huixtlense*, we found 2428 (5.62%)  
251 substitutions in genes of LSC, 205 (2.0%) substitutions in genes of IRs, and 1327 (9.16%) in  
252 genes of SSC. We found a higher rate of evolution in *P. scandens* genes than in *A. huixtlense*  
253 and observed a difference of 0.043% in genes of LSC, 0.64% in genes of IRs, and 0.11% in  
254 genes of SSC. We observed the highest difference in evolution rate between *P. scandens* and  
255 *A. huixtlense* in IRs. This might be due to transfer of most of the IR genes of *P. scandens* to  
256 LSC region. To further verify the effect of rate heterotachy, we separately compared the rate  
257 of evolution of those genes that transferred from SSC to IRs in *P. scandens*. Genes of *P.*  
258 *scandens* that transferred from SSC to IRs showed 0.43% less evolution than genes of *A.*  
259 *huixtlense*, whereas average rate of evolution of the genes of all regions were found higher in  
260 *P. scandens* than *A. huixtlense*. This confirmed transferring of the genes from single-copy  
261 regions to IRs is responsible for decrease evolution rates.

### 262 **3.6 Phylogenetic inference of the family Araceae**

263 The phylogenetic tree was reconstructed with the best fit Model TVM+F+I+G4. The  
264 nucleotide alignment contained a total of 84,820 sites in which 59,644 were invariable,  
265 11,617 were parsimony informative, and 7783 sites showed a distinct pattern. The  
266 phylogenetic tree resolved the evolutionary relationships of all species of all the subfamilies  
267 with high bootstrap support (Fig. 6), apart from the position of *Epipremnum aureum*. The  
268 *Epipremnum* genus is included in subfamily Monsteroideae (Zuluaga et al. 2019) but here  
269 was found to be embedded in subfamily Aroideae and to share a node with *Zantedeschia*.  
270 This result was previously observed by Kim et al. (2019) and Henriquez et al. (2020a). This  
271 might be due to chloroplast capture by this species of some other species or due to  
272 misidentification of the species.

### 273 **Discussion**

274 In the current study, we assembled the chloroplast genomes of two species from the  
275 subfamily Pothoideae. The chloroplast genomes of both *P. scandens* and *A. huixtlense* were  
276 found to be unique among Araceae species and showed a unique type of IR contraction and  
277 expansion that affected the evolution rate in *P. scandens*.

278 In the current study, the chloroplast genome of *P. scandens* showed uneven IR contraction  
279 and expansion, which led to a variable number of genes. IR contraction and expansion is very  
280 common in chloroplast genomes and leads to variation in the number of genes in various  
281 plant lineages, including Araceae (Menezes et al. 2018; Cho et al. 2018; Lee et al. 2018;  
282 Abdullah et al. 2020; Henriquez et al. 2020a). IR contraction and expansion also results in  
283 new combinations of genes in the IR regions, which in turn leads to rearrangement of genes  
284 in the SSC region, as previously reported in Araceae (Wang and Messing 2011; Henriquez et  
285 al. 2020a). However, in *P. scandens* we observed the formation of a new combination of  
286 genes in IRs but not an accompanying rearrangement of the genes. A similar effect of IR  
287 contraction and expansion was also reported in other plant lineages without any effect on the  
288 arrangement of genes (Cho et al. 2018; Lee et al. 2018). In *P. scandens*, the SSC region  
289 showed significant shortening and contained only two genes. Similar shortening of the SSC  
290 region was also reported in other angiosperms and even smaller SSC regions have been  
291 reported (Cho et al. 2018; Lee et al. 2018). Previously, four types of gene arrangements were  
292 observed in Araceae. Two types of gene arrangements were observed at IR junctions in one  
293 comparison of Araceae species (Choi et al. 2017) and two other types of gene arrangements  
294 at the junctions were reported in the chloroplast genomes of two species of subfamily  
295 Aroideae, including *Anchomanes hookeri* and *Zantedeschia aethiopica* (Henriquez et al.

296 2020a). In the current study, we report a fifth type of gene arrangement at the junctions in the  
297 chloroplast genome of *P. scandens*. Further genomic resources from the genus *Pothos* and  
298 subfamily Pothoideae might be helpful to gain insight into chloroplast genome structure and  
299 to discern whether this uneven IR contraction and expansion occurs only in *P. scandens* or in  
300 the genus *Pothos* as a whole.

301 The expansion of IR regions in our study decrease the evolution rate of protein-coding genes  
302 that transfer from SSC to IR, whereas an increase in the evolution rate can be observed in the  
303 genes that transfer from LSC to IRs. Similar results were reported in the chloroplast genomes  
304 of other species and a higher rate was observed in the regions that exist in the single-copy  
305 region instead of IR region (Zhu et al. 2016). In contrast, the effect on evolution rate in  
306 *Pelargonium* was not observed due to IR contraction and expansion (Weng et al. 2017). The  
307 low evolution rate of genes that exist in IR regions might be due to a repairing mechanism  
308 (Zhu et al. 2016).

309 We observed high GC content in the IR regions when compared with the LSC and SSC  
310 regions. Chloroplast genomes are mostly conserved in terms of gene content and  
311 organization, and similar observations were also reported in other angiosperms including  
312 other subfamilies of Araceae (Wang and Messing 2011; Iram et al. 2019; Abdullah et al.  
313 2020; Henriquez et al. 2020b, a; Shahzadi et al. 2020). The IR regions of the genome of *P.*  
314 *scandens* showed a decrease in GC content up to 5% when compared with *A. huixtlense*. This  
315 might be due to expansion of the IR regions, which leads to inclusion of most of the SSC  
316 region (which has low GC content).

317 Amino acid frequency analyses showed a high encoding frequency of leucine and iso-leucine  
318 and a low frequency of cysteine. Higher RSCU values ( $\geq 1$ ) were found for codons with A or  
319 T at the 3' position and showed high encoding efficacy. Similar results for amino acid  
320 frequency and codon usage have also been reported in the chloroplast genomes of other  
321 angiosperms, which might be due to the high AT content in the chloroplast genome  
322 (Amiryousefi et al. 2018b; Menezes et al. 2018; Abdullah et al. 2019b; Mehmood et al.  
323 2020). The analyses of oligonucleotide repeats showed the existence of four types of repeats,  
324 but the repeats varied in size and types between the two species. The variation in the types  
325 and size of repeats were also previously reported in the chloroplast genomes of angiosperms  
326 and in other species of Araceae (Abdullah et al. 2020; Mehmood et al. 2020; Henriquez et al.

327 2020a). These repeats can be used as a proxy to identify mutational hotspots (Ahmed et al.  
328 2012).

329 We found higher levels of transition substitutions than transversion substitutions. This is  
330 expected in all types of DNA sequences (Wakeley 1996). However, fewer transition  
331 substitution have been reported when compared to transversion substitutions in chloroplast  
332 genomes (Cai et al. 2015; Abdullah et al. 2019a; Shahzadi et al. 2020). This bias of higher  
333 transversions might be due to the composition of genomes and the genetic characteristics of  
334 codons (Morton et al. 1997). Our study is consistent with the statement above regarding the  
335 characteristics of codons, as we observed higher transition substitutions in synonymous  
336 substitutions than non-synonymous substitutions. A similar result was also reported in the  
337 chloroplast genomes of *Firmiana*, a genus of family Malvaceae (Abdullah et al. 2019a).  
338 Here, we reported a higher rate of transitions in the coding genes than that of transversions.  
339 Similar results were also reported in the coding sequences of the species of Lemnoideae  
340 (Araceae) and in the complete chloroplast genome of *Dioscorea polystachya* (Cao et al.  
341 2018).

342 The rate of evolution of protein coding genes showed strong purifying selection pressure. The  
343 higher rate of synonymous substitutions than non-synonymous substitutions suggests strong  
344 purifying selection pressure acting on these genes during the course of evolution (Matsuoka  
345 et al. 2002). These results are also consistent with previous studies on angiosperm chloroplast  
346 genomes and with the closest subfamily (Monsteroideae) of Pothoideae (Menezes et al. 2018;  
347 Abdullah et al. 2019a, 2020; Henriquez et al. 2020b; Shahzadi et al. 2020). Here, no protein-  
348 coding genes were found under positive selection pressure. However, seven genes in  
349 Monsteroideae were found under positive selection pressure, whereas in another study of  
350 Araceae most genes were reported under positive selection pressure (Kim et al. 2019).

351 In conclusion, our study provides insight into the evolution of chloroplast genomes of  
352 Pothoideae (Araceae). Our study shows unique IR contraction and expansion affecting the  
353 number of genes and rate of evolution in *P. scandens*. We observed a two-fold higher  
354 transition substitution rate than transversion substitutions and found higher transversion  
355 substitutions linked with non-synonymous substitutions when compared with transition  
356 substitutions.

### 357 **Conflict of interest**

358 No conflict of interest exists.

359 **Acknowledgment**

360 The authors would like to thank Dr. Barbara Schaal at Washington University in St. Louis  
361 and Dr. J. Chris Pires at the University of Columbia, Missouri for funding and laboratory  
362 support. The authors would also like to thank Dr. Tatiana Arias for valuable help in the  
363 laboratory and data processing. The authors also thank Emily Colletti in the aroid greenhouse  
364 at the Missouri Botanical Garden for help with living material.

365 **Funding**

366 Funding for this study was provided by the GAANN fellow- ship, the Rettner B. Morris  
367 Scholarship, Washington University in St. Louis, J. Chris Pires Lab (NSF DEB 1146603).

368

369 **References**

- 370 Abdullah, Mehmood F, Shahzadi I, et al (2020) Chloroplast genome of *Hibiscus rosa-sinensis*  
371 (Malvaceae): Comparative analyses and identification of mutational hotspots. *Genomics*  
372 112:581–591. doi: 10.1016/j.ygeno.2019.04.010
- 373 Abdullah, Shahzadi I, Mehmood F, et al (2019a) Comparative analyses of chloroplast  
374 genomes among three *Firmiana* species: Identification of mutational hotspots and  
375 phylogenetic relationship with other species of Malvaceae. *Plant Gene* 19:100199. doi:  
376 10.1016/J.PLGENE.2019.100199
- 377 Abdullah, Waseem S, Mirza B, et al (2019b) Comparative analyses of chloroplast genome in  
378 *Theobroma cacao* and *Theobroma grandiflorum*. *Biologia (Bratisl)*
- 379 Ahmed I (2014) Evolutionary dynamics in taro. Massey University, Palmerston North, New  
380 Zealand
- 381 Ahmed I, Biggs PJ, Matthews PJ, et al (2012) Mutational dynamics of aroid chloroplast  
382 genomes. *Genome Biol Evol* 4:1316–1323. doi: 10.1093/gbe/evs110
- 383 Ahmed I, Matthews PJ, Biggs PJ, et al (2013) Identification of chloroplast genome loci  
384 suitable for high-resolution phylogeographic studies of *Colocasia esculenta* (L.) Schott  
385 (Araceae) and closely related taxa. *Mol Ecol Resour* 13:929–937. doi: 10.1111/1755-  
386 0998.12128
- 387 Amiryousefi A, Hyvönen J, Poczai P (2018a) IRscope: an online program to visualize the  
388 junction sites of chloroplast genomes. *Bioinformatics* 34:3030–3031. doi:  
389 10.1093/bioinformatics/bty220
- 390 Amiryousefi A, Hyvönen J, Poczai P (2018b) The chloroplast genome sequence of  
391 bittersweet ( *Solanum dulcamara* ): Plastid genome structure evolution in Solanaceae.  
392 *PLoS One* 13:1–23. doi: 10.1371/journal.pone.0196069
- 393 Andrews S (2017) FastQC: A Quality Control tool for High Throughput Sequence Data.  
394 <https://www.bioinformatics.babraham.ac.uk/projects/fastqc/>. Accessed 15 Sep 2019
- 395 Boyce PC, Croat TB (2018) The Überlist of Araceae, Totals for Published and Estimated  
396 Number of Species in Aroid Genera
- 397 Cabrera LI, Salazar GA, Chase MW, et al (2008) Phylogenetic relationships of aroids and

- 398 duckweeds (Araceae) inferred from coding and noncoding plastid DNA. *Am J Bot*  
399 95:1153–1165. doi: 10.3732/ajb.0800073
- 400 Cai J, Ma PF, Li HT, Li DZ (2015) Complete plastid genome sequencing of four tilia species  
401 (Malvaceae): A comparative analysis and phylogenetic implications. *PLoS One* 10:1–  
402 13. doi: 10.1371/journal.pone.0142705
- 403 Cao J, Jiang D, Zhao Z, et al (2018) Development of Chloroplast Genomic Resources in  
404 Chinese Yam (*Dioscorea polystachya*). *Biomed Res Int* 2018:1–11. doi:  
405 10.1155/2018/6293847
- 406 Cho WB, Han EK, Choi G, Lee JH (2018) The complete chloroplast genome of *Daphne*  
407 *kiusiana*, an evergreen broad-leaved shrub on Jeju Island. *Conserv Genet Resour*  
408 10:103–106. doi: 10.1007/s12686-017-0774-5
- 409 Choi KS, Park KT, Park S (2017) The Chloroplast Genome of *Symplocarpus renifolius* □: A  
410 Comparison of Chloroplast Genome Structure in Araceae. *Genes (Basel)* 8:324. doi:  
411 10.3390/genes8110324
- 412 Christenhusz MJM, Byng JW (2016) The number of known plants species in the world and  
413 its annual increase. *Phytotaxa* 261:201–217. doi: 10.11646/phytotaxa.261.3.1
- 414 Cooper G (2000) *Chloroplasts and other plastids in the cell: A molecular approach*, 2nd edn.  
415 Sunderland (MA): Sinauer Associates
- 416 Cusimano N, Bogner J, Mayo SJ, et al (2011) Relationships within the Araceae: Comparison  
417 of morphological patterns with molecular phylogenies. *Am J Bot* 98:654–668. doi:  
418 10.3732/ajb.1000158
- 419 Daniell H (2007) Transgene containment by maternal inheritance: effective or elusive? *Proc*  
420 *Natl Acad Sci U S A* 104:6879–6880. doi: 10.1073/pnas.0702219104
- 421 Daniell H, Lin C-S, Yu M, Chang W-J (2016) Chloroplast genomes: diversity, evolution, and  
422 applications in genetic engineering. *Genome Biol* 17:134. doi: 10.1186/s13059-016-  
423 1004-2
- 424 Darling ACE, Mau B, Blattner FR, Perna NT (2004) Mauve: Multiple Alignment of  
425 Conserved Genomic Sequence With Rearrangements. *Genome Res* 14:1394–1403. doi:  
426 10.1101/gr.2289704

- 427 Ewels P, Magnusson M, Lundin S, Källér M (2016) MultiQC: summarize analysis results for  
428 multiple tools and samples in a single report. *Bioinformatics* 32:3047–8. doi:  
429 10.1093/bioinformatics/btw354
- 430 Greiner S, Lehwark P, Bock R (2019) OrganellarGenomeDRAW (OGDRAW) version 1.3.1:  
431 expanded toolkit for the graphical visualization of organellar genomes. *Nucleic Acids*  
432 *Res* 47:W59–W64. doi: 10.1093/nar/gkz238
- 433 Gunawardena AHLAN, Dengler NG (2006) Alternative modes of leaf dissection in  
434 monocotyledons. *Bot J Linn Soc* 150:25–44. doi: 10.1111/j.1095-8339.2006.00487.x
- 435 Han L, Wang B, Wang ZZ (2016) The complete chloroplast genome sequence of  
436 *Spathiphyllum kochii*. *Mitochondrial DNA* 27:2973–2974. doi:  
437 10.3109/19401736.2015.1060466
- 438 Henriquez CL, Abdullah, Ahmed I, et al (2020a) Evolutionary dynamics in chloroplast  
439 genomes of subfamily Aroideae (Araceae). *Genomics*. doi: 10.1016/j.ygeno.2020.01.006
- 440 Henriquez CL, Abdullah, Ahmed I, et al (2020b) Molecular evolution of chloroplast genomes  
441 in Monsteroideae ( Araceae ). *Planta* 251:72. doi: 10.1007/s00425-020-03365-7
- 442 Henriquez CL, Arias T, Pires JC, et al (2014) Phylogenomics of the plant family Araceae.  
443 *Mol Phylogenet Evol* 75:91–102. doi: 10.1016/j.ympev.2014.02.017
- 444 Hirao T, Watanabe A, Kurita M, et al (2008) Complete nucleotide sequence of the  
445 *Cryptomeria japonica* D. Don. chloroplast genome and comparative chloroplast  
446 genomics: Diversified genomic structure of coniferous species. *BMC Plant Biol* 8:. doi:  
447 10.1186/1471-2229-8-70
- 448 Hoang DT, Chernomor O, von Haeseler A, et al (2018) UFBoot2: Improving the ultrafast  
449 bootstrap approximation. *Mol Biol Evol* 35:518–522. doi: 10.1093/molbev/msx281
- 450 Iram S, Hayat MQ, Tahir M, et al (2019) Chloroplast genome sequence of *Artemisia*  
451 *scoparia*: Comparative analyses and screening of mutational hotspots. *Plants* 8:476. doi:  
452 doi:10.3390/plants8110476
- 453 Kalyanamoorthy S, Minh BQ, Wong TKF, et al (2017) ModelFinder: fast model selection  
454 for accurate phylogenetic estimates. *Nat Methods* 14:587–589. doi: 10.1038/nmeth.4285
- 455 Katoh K, Kuma KI, Toh H, Miyata T (2005) MAFFT version 5: Improvement in accuracy of



- 456 multiple sequence alignment. *Nucleic Acids Res* 33:511–518. doi: 10.1093/nar/gki198
- 457 Kearse M, Moir R, Wilson A, et al (2012) Geneious Basic: An integrated and extendable  
458 desktop software platform for the organization and analysis of sequence data.  
459 *Bioinformatics* 28:1647–1649. doi: 10.1093/bioinformatics/bts199
- 460 Kim S-H, Yang J, Park J, et al (2019) Comparison of Whole Plastome Sequences between  
461 Thermogenic Skunk Cabbage *Symplocarpus renifolius* and Nonthermogenic *S.*  
462 *nipponicus* (Orontioideae; Araceae) in East Asia. *Int J Mol Sci* 20:4678. doi:  
463 10.3390/ijms20194678
- 464 Kurtz S, Choudhuri J V, Ohlebusch E, et al (2001) REPuter: the manifold applications of  
465 repeat analysis on a genomic scale. *Nucleic Acids Res* 29:4633–4642
- 466 Lee SY, Ng WL, Mohamed R, Terhem R (2018) The complete chloroplast genome of  
467 *Aquilaria malaccensis* Lam. (Thymelaeaceae), an important and threatened agarwood-  
468 producing tree species. *Mitochondrial DNA Part B* 3:1120–1121. doi:  
469 10.1080/23802359.2018.1519382
- 470 Lehwark P, Greiner S (2019) GB2sequin - A file converter preparing custom GenBank files  
471 for database submission. *Genomics* 111:759–761. doi: 10.1016/J.YGENO.2018.05.003
- 472 Lockhart P, Novis P, Milligan BG, et al (2006) Heterotachy and Tree Building: A Case Study  
473 with Plastids and Eubacteria. *Mol Biol Evol* 23:40–45. doi: 10.1093/molbev/msj005
- 474 Matsuoka Y, Yamazaki Y, Ogihara Y, Tsunewaki K (2002) Whole chloroplast genome  
475 comparison of rice, maize, and wheat: Implications for chloroplast gene diversification  
476 and phylogeny of cereals. *Mol Biol Evol* 19:2084–2091
- 477 Mehmood F, Abdullah, Shahzadi I, et al (2020) Characterization of *Withania somnifera*  
478 chloroplast genome and its comparison with other selected species of Solanaceae.  
479 *Genomics* 112:1522–1530. doi: 10.1016/j.ygeno.2019.08.024
- 480 Menezes APA, Resende-Moreira LC, Buzatti RSO, et al (2018) Chloroplast genomes of  
481 *Byrsonima* species (Malpighiaceae): Comparative analysis and screening of high  
482 divergence sequences. *Sci Rep* 8:1–12. doi: 10.1038/s41598-018-20189-4
- 483 Morton BR, Oberholzer VM, Clegg MT (1997) The influence of specific neighboring bases  
484 on substitution bias in noncoding regions of the plant chloroplast genome. *J Mol Evol*  
485 45:227–31

- 486 Nauheimer L, Metzler D, Renner SS (2012) Global history of the ancient monocot family  
487 Araceae inferred with models accounting for past continental positions and previous  
488 ranges based on fossils. *New Phytol* 195:938–950. doi: 10.1111/j.1469-  
489 8137.2012.04220.x
- 490 Nguyen L-T, Schmidt HA, von Haeseler A, Minh BQ (2015) IQ-TREE: A fast and effective  
491 stochastic algorithm for estimating Maximum-likelihood phylogenies. *Mol Biol Evol*  
492 32:268–274. doi: 10.1093/molbev/msu300
- 493 Oldenburg DJ, Bendich AJ (2016) The linear plastid chromosomes of maize: terminal  
494 sequences, structures, and implications for DNA replication. *Curr Genet* 62:431–442.  
495 doi: 10.1007/s00294-015-0548-0
- 496 Palmer JD (1985) Comparative organization of chloroplast genomes. *Annu Rev Genet*  
497 19:325–354. doi: 10.1146/annurev.ge.19.120185.001545
- 498 Rozas J, Ferrer-Mata A, Sanchez-DelBarrio JC, et al (2017) DnaSP 6: DNA sequence  
499 polymorphism analysis of large data sets. *Mol Biol Evol* 34:3299–3302. doi:  
500 10.1093/molbev/msx248
- 501 Shahzadi I, Abdullah, Mehmood F, et al (2020) Chloroplast genome sequences of *Artemisia*  
502 *maritima* and *Artemisia absinthium*: Comparative analyses, mutational hotspots in genus  
503 *Artemisia* and phylogeny in family Asteraceae. *Genomics* 112:1454–1463. doi:  
504 10.1016/J.YGENO.2019.08.016
- 505 Tian N, Han L, Chen C, Wang Z (2018) The complete chloroplast genome sequence of  
506 *Epipremnum aureum* and its comparative analysis among eight Araceae species. *PLoS*  
507 *One* 13:e0192956. doi: 10.1371/journal.pone.0192956
- 508 Tillich M, Lehwark P, Pellizzer T, et al (2017) GeSeq – versatile and accurate annotation of  
509 organelle genomes. *Nucleic Acids Res* 45:W6–W11. doi: 10.1093/nar/gkx391
- 510 Wakeley J (1996) The excess of transitions among nucleotide substitutions: New methods of  
511 estimating transition bias underscore its significance. *Trends Ecol. Evol.* 11:158–162
- 512 Walker JF, Jansen RK, Zanis MJ, Emery NC (2015) Sources of inversion variation in the  
513 small single copy (SSC) region of chloroplast genomes. *Am. J. Bot.* 102:1751–1752
- 514 Wang W, Messing J (2011) High-Throughput sequencing of three Lemnoideae (duckweeds)  
515 chloroplast genomes from total DNA. *PLoS One* 6:. doi: 10.1371/journal.pone.0024670

- 516 Weng M-L, Ruhlman TA, Jansen RK (2017) Expansion of inverted repeat does not decrease  
517 substitution rates in *Pelargonium* plastid genomes. *New Phytol* 214:842–851. doi:  
518 10.1111/nph.14375
- 519 Wu CS, Lin CP, Hsu CY, et al (2011) Comparative chloroplast genomes of pinaceae: Insights  
520 into the mechanism of diversified genomic organizations. *Genome Biol Evol* 3:309–319.  
521 doi: 10.1093/gbe/evr026
- 522 Yi X, Gao L, Wang B, et al (2013) The Complete Chloroplast Genome Sequence of  
523 *Cephalotaxus oliveri* (Cephalotaxaceae): Evolutionary Comparison of *Cephalotaxus*  
524 Chloroplast DNAs and Insights into the Loss of Inverted Repeat Copies in  
525 Gymnosperms. *Genome Biol Evol* 5:688–698. doi: 10.1093/gbe/evt042
- 526 Zhu A, Guo W, Gupta S, et al (2016) Evolutionary dynamics of the plastid inverted repeat:  
527 the effects of expansion, contraction, and loss on substitution rates. *New Phytol*  
528 209:1747–1756. doi: 10.1111/nph.13743
- 529 Zuluaga A, Llano M, Cameron K (2019) Systematics, Biogeography, and Morphological  
530 Character Evolution of the Hemiepiphytic Subfamily Monsteroideae (Araceae). *Ann*  
531 *Missouri Bot Gard* 104:33–48. doi: 10.3417/2018269
- 532
- 533

534

### Figure legends

535 **Fig. 1. Circular diagram of chloroplast genomes of *A. huixtlense* and *P. scandens*.** LSC,  
536 SSC, and IR represent large single copy, small single copy, and inverted repeat regions,  
537 respectively. The genes located inside are transcribed counterclockwise, whereas the genes  
538 located outside are transcribed clockwise.

539 **Fig 2. Amino acid frequency in *A. huixtlense* and *P. scandens*.** The x-axis shows amino  
540 acids whereas the Y-axis shows percentage of amino acid frequency.

541 **Fig. 3. Analyses of repeats in *A. huixtlense* and *P. scandens*.** (A) represents types of  
542 repeats. (B) Distribution of repeats in the chloroplast genomes (C). The size of repeats in the  
543 genome. F = Forward, C = complementary, R = reverse, and P = palindromic, LSC = large  
544 single copy, SSC = small single copy, IR = inverted repeat, LSC/SSC and LSC/IR represent  
545 those repeats shared between regions.

546 **Fig. 4. Analyses of gene arrangements among the species of Araceae based on Mauve**  
547 **alignment.** White boxes indicate protein-coding genes, red indicate rRNA, black indicate  
548 tRNA, green indicate intron-containing tRNA, the line between two white boxes indicates  
549 intron-containing genes.

550 **Fig. 5. Comparative analysis of junction sites in Araceae chloroplast genomes.**  
551 Abbreviations denote junction site of the plastid genome JLA (IRa/LSC), JLB (IRb/LSC),  
552 JSA (SSC/IRa) and JSB (IRb/SSC). Genes are represented by colored boxes while arrows are  
553 showing the coordinate positions of each gene near the junctions. Genes displayed on the top  
554 appear on the negative strand, while genes present below and found on the positive strand of  
555 the genome.

556 **Fig 6.** Maximum likelihood phylogenetic tree of the Araceae family reconstructed from  
557 plastid genome data

**Table 1.** Comparative analyses of chloroplast genomes of *P. scandens* and *A. huixtlense*

| <b>Characteristics</b> |           | <b><i>Pothos scandens</i></b> | <b><i>Anthurium huixtlense</i></b> |
|------------------------|-----------|-------------------------------|------------------------------------|
| Size (base pair; bp)   |           | 164,719                       | 163,116                            |
| LSC length (bp)        |           | 102,956                       | 89,260                             |
| SSC length (bp)        |           | 6779                          | 22,982                             |
| IR length (bp)         |           | 27,492                        | 25,437                             |
| Number of genes        |           | 135                           | 130                                |
| Protein-coding genes   |           | 90                            | 85                                 |
| tRNA genes             |           | 36                            | 37                                 |
| rRNA genes             |           | 8                             | 8                                  |
| Duplicate genes        |           | 22                            | 17                                 |
| GC content             | Total (%) | 35.4                          | 36.2                               |
|                        | LSC (%)   | 34.7                          | 34.5                               |
|                        | SSC (%)   | 28.8                          | 28.5                               |
|                        | IR (%)    | 37.3                          | 42.7                               |
|                        | CDS (%)   | 37.4                          | 38                                 |
|                        | rRNA (%)  | 54.9                          | 55                                 |
|                        | tRNA (%)  | 53.3                          | 53.2%                              |

**Table 2.** Transition and transversion substitutions in coding genes of *P. scandens* and *A. huixtlense*

| <b>SNP type</b> | <b><i>P. scandens</i></b> | <b><i>A. huixtlense</i></b> |
|-----------------|---------------------------|-----------------------------|
| C/T             | 491                       | 1331                        |
| A/G             | 1416                      | 1359                        |
| A/T             | 1398                      | 250                         |
| C/G             | 255                       | 144                         |
| G/T             | 157                       | 358                         |
| A/C             | 344                       | 518                         |

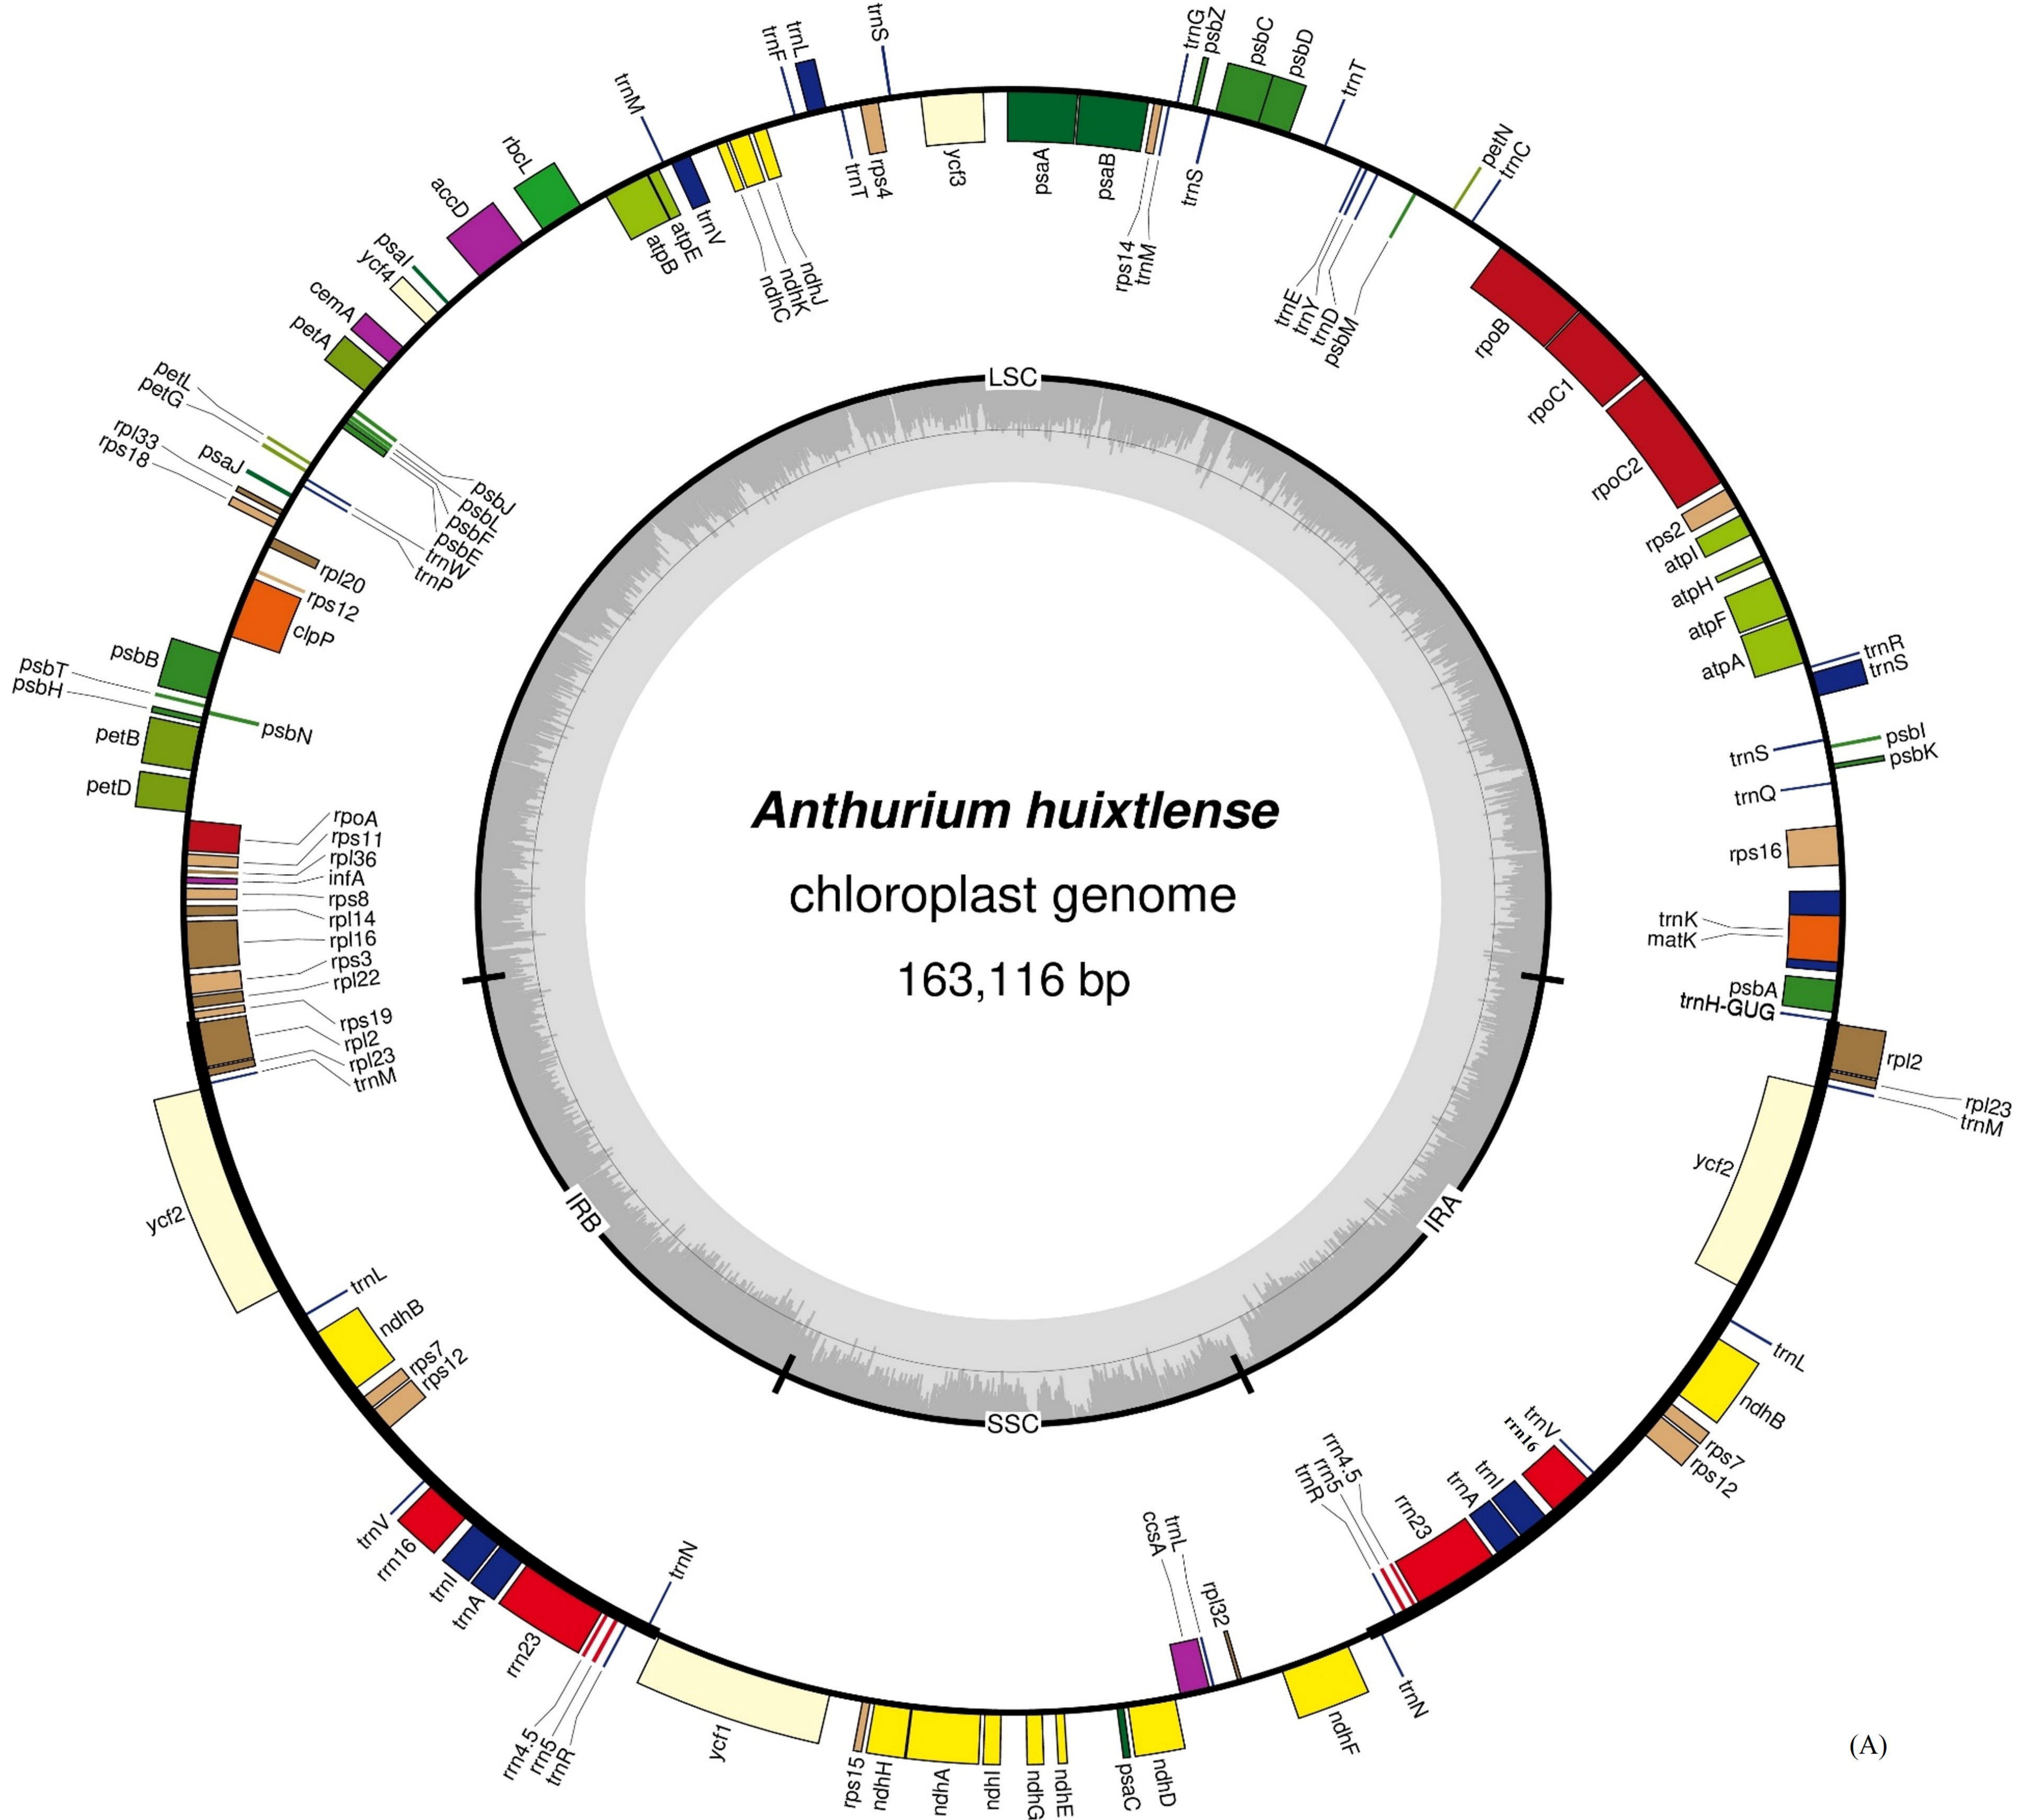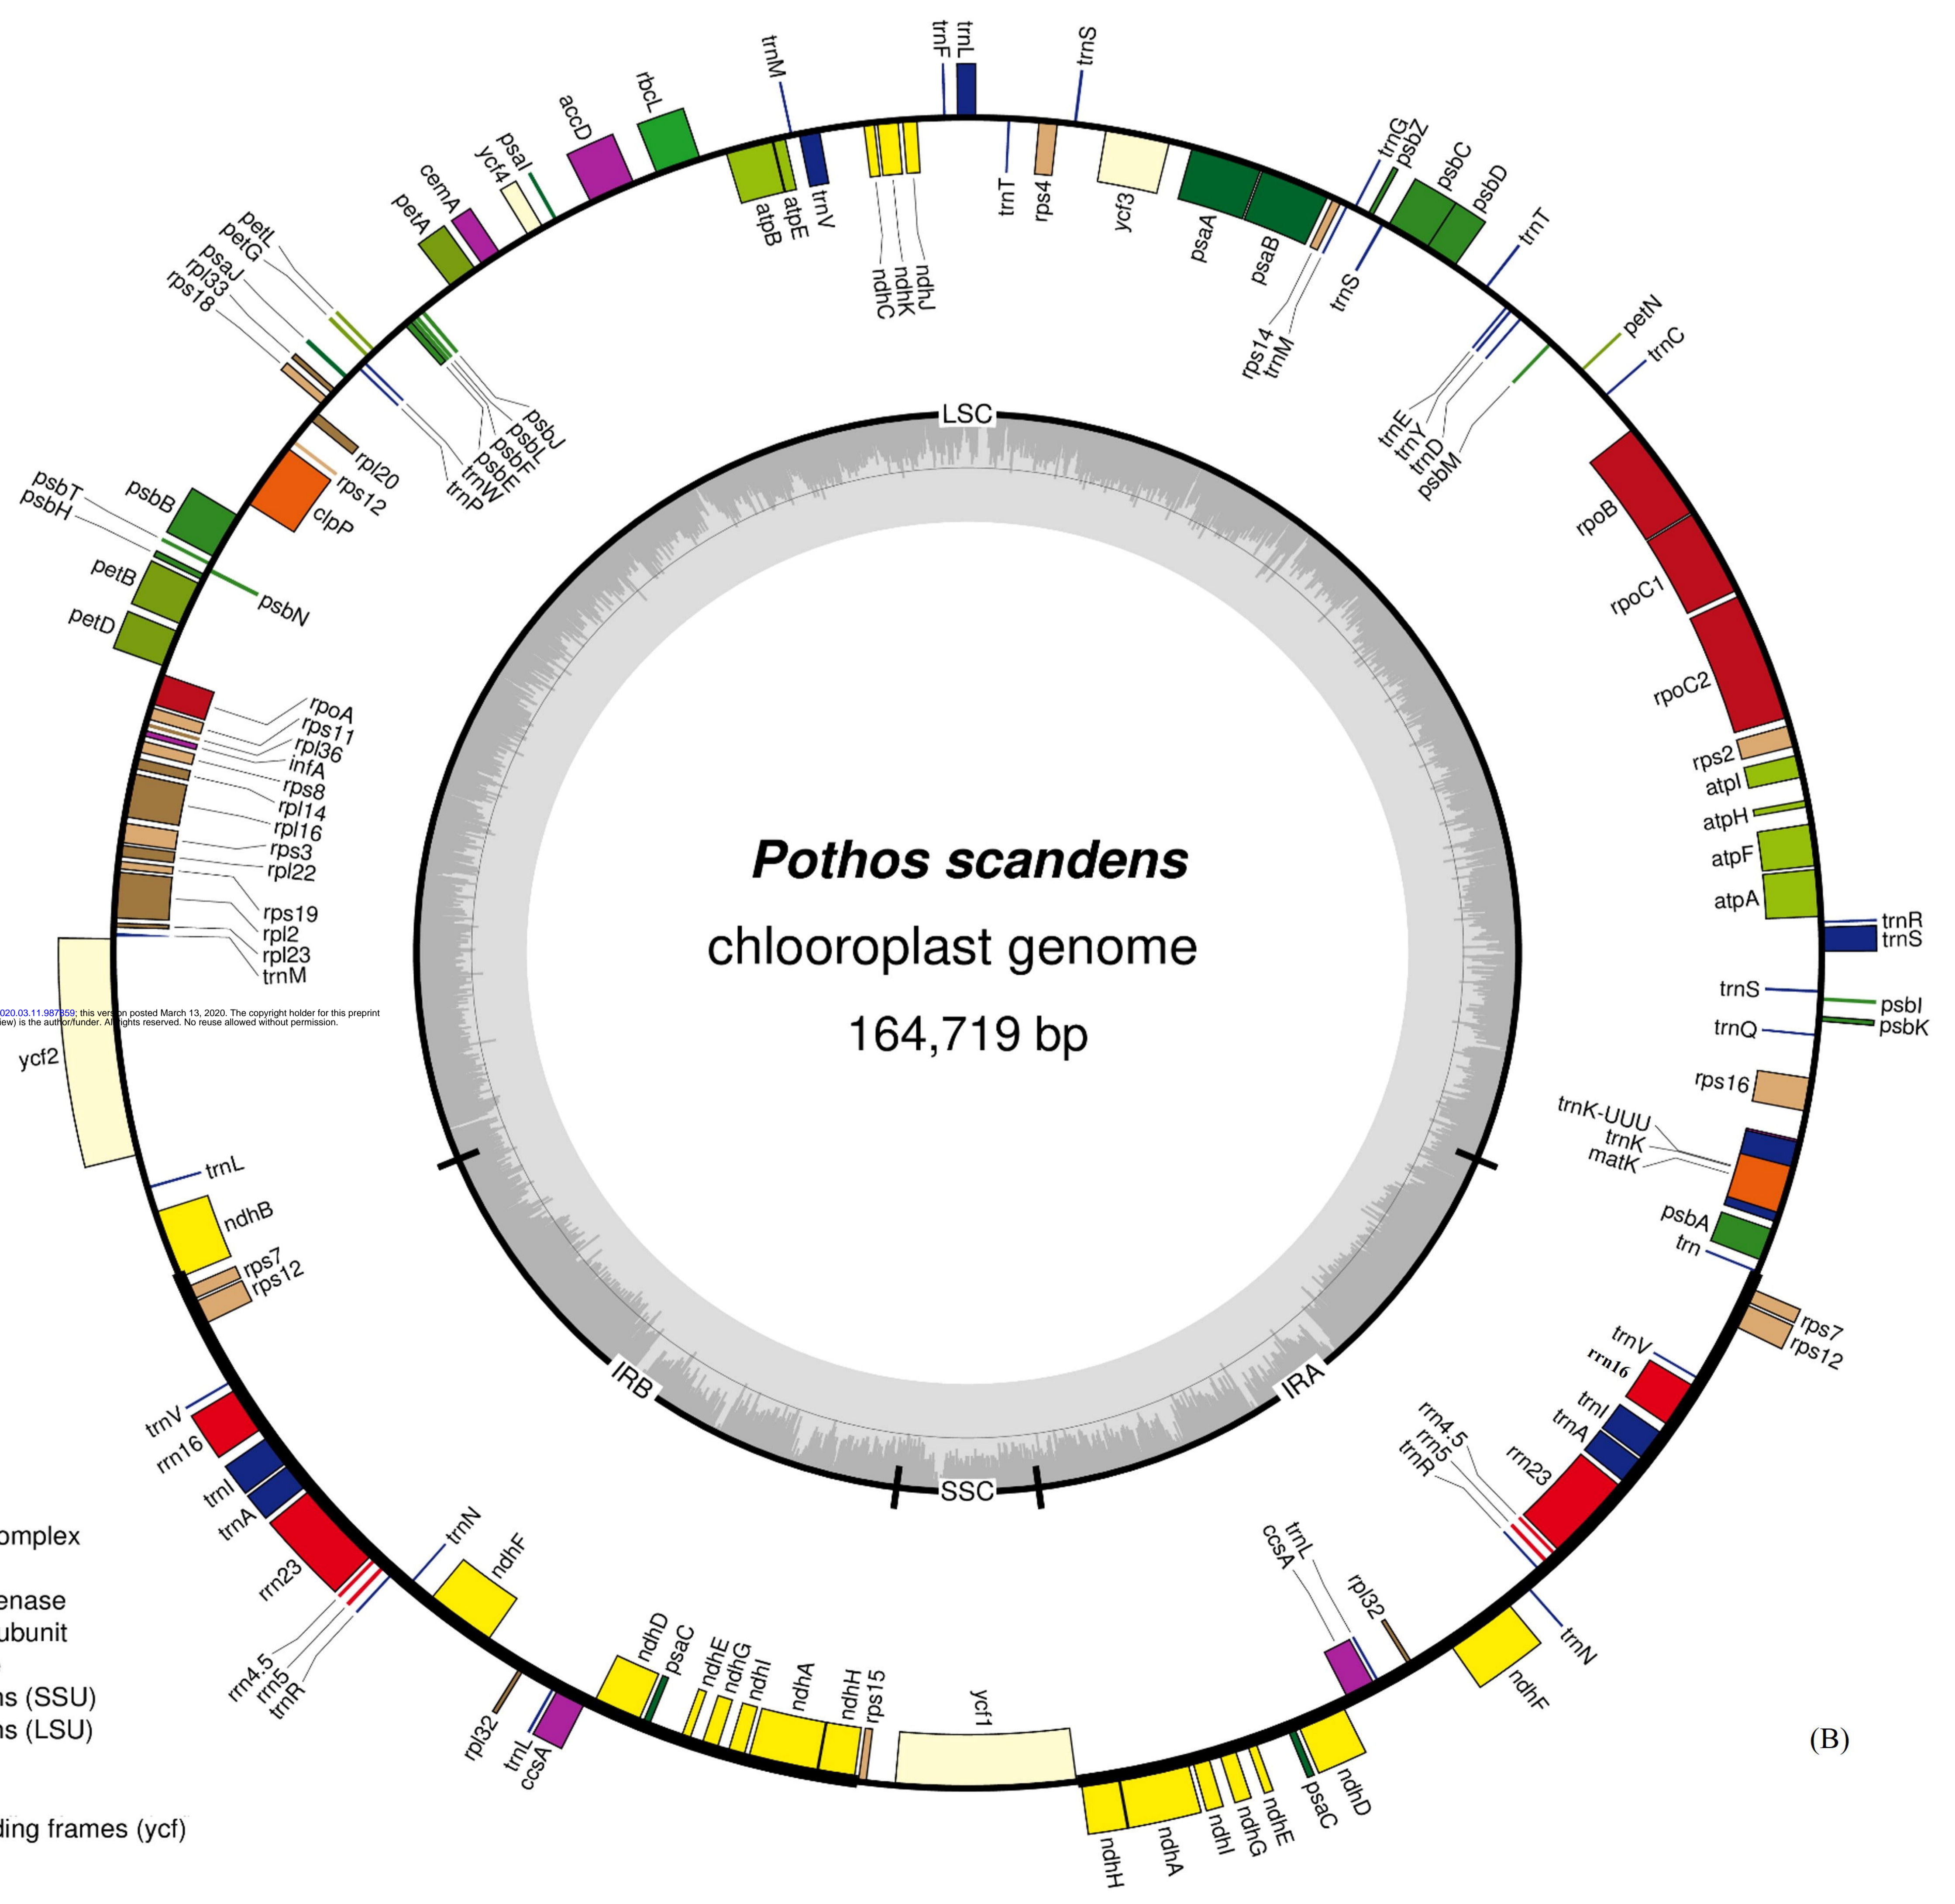

bioRxiv preprint doi: <https://doi.org/10.1101/2020.03.11.987859>; this version posted March 13, 2020. The copyright holder for this preprint (which was not certified by peer review) is the author/funder. All rights reserved. No reuse allowed without permission.

- photosystem I
- photosystem II
- cytochrome b/f complex
- ATP synthase
- NADH dehydrogenase
- RubisCO large subunit
- RNA polymerase
- ribosomal proteins (SSU)
- ribosomal proteins (LSU)
- clpP, matK
- other genes
- hypothetical reading frames (ycf)
- transfer RNAs
- ribosomal RNAs

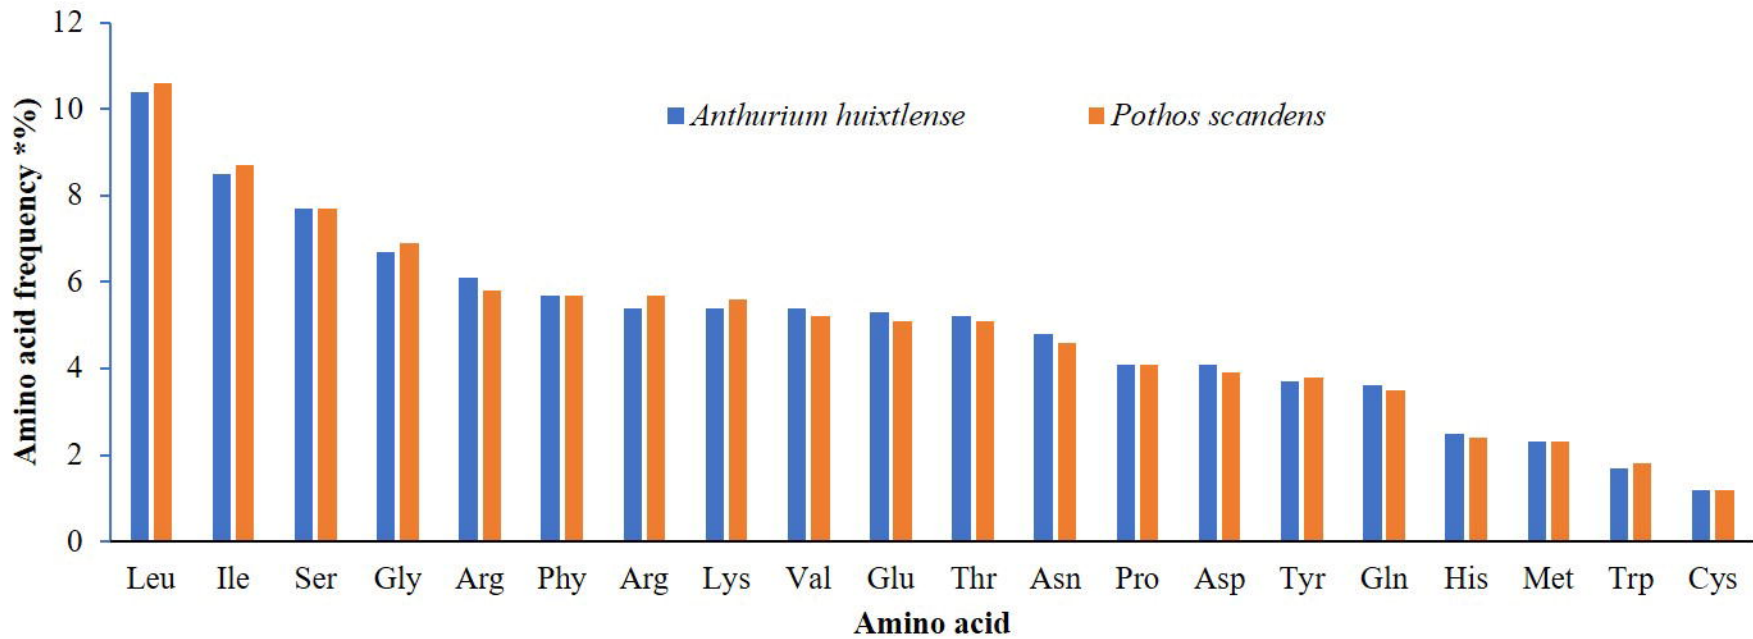

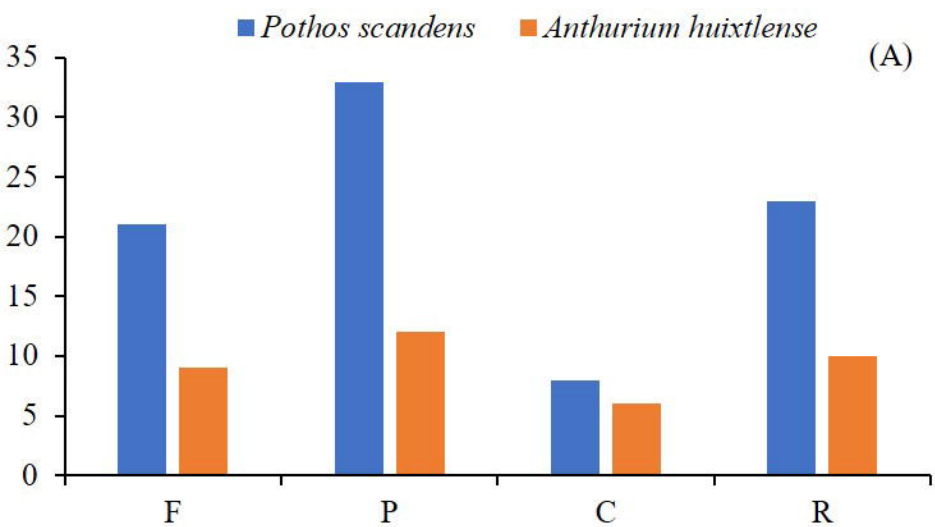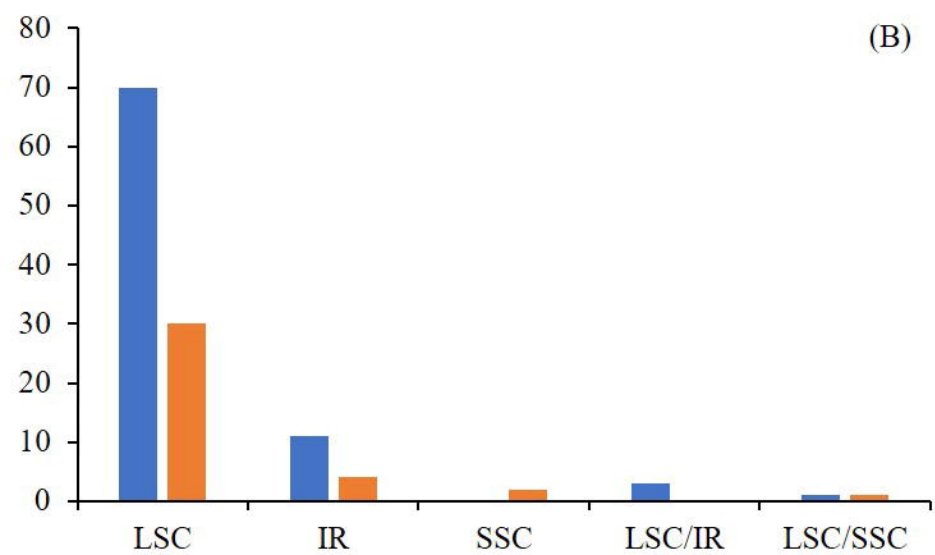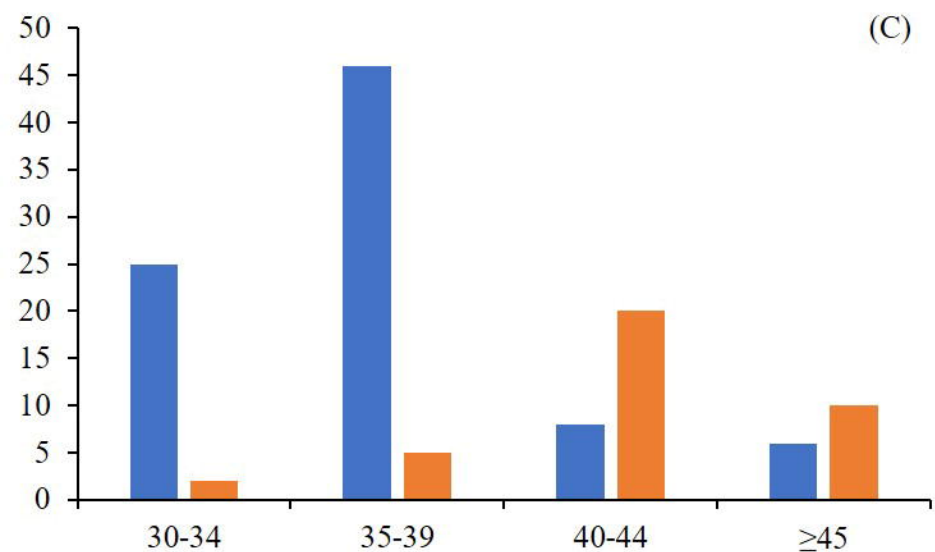



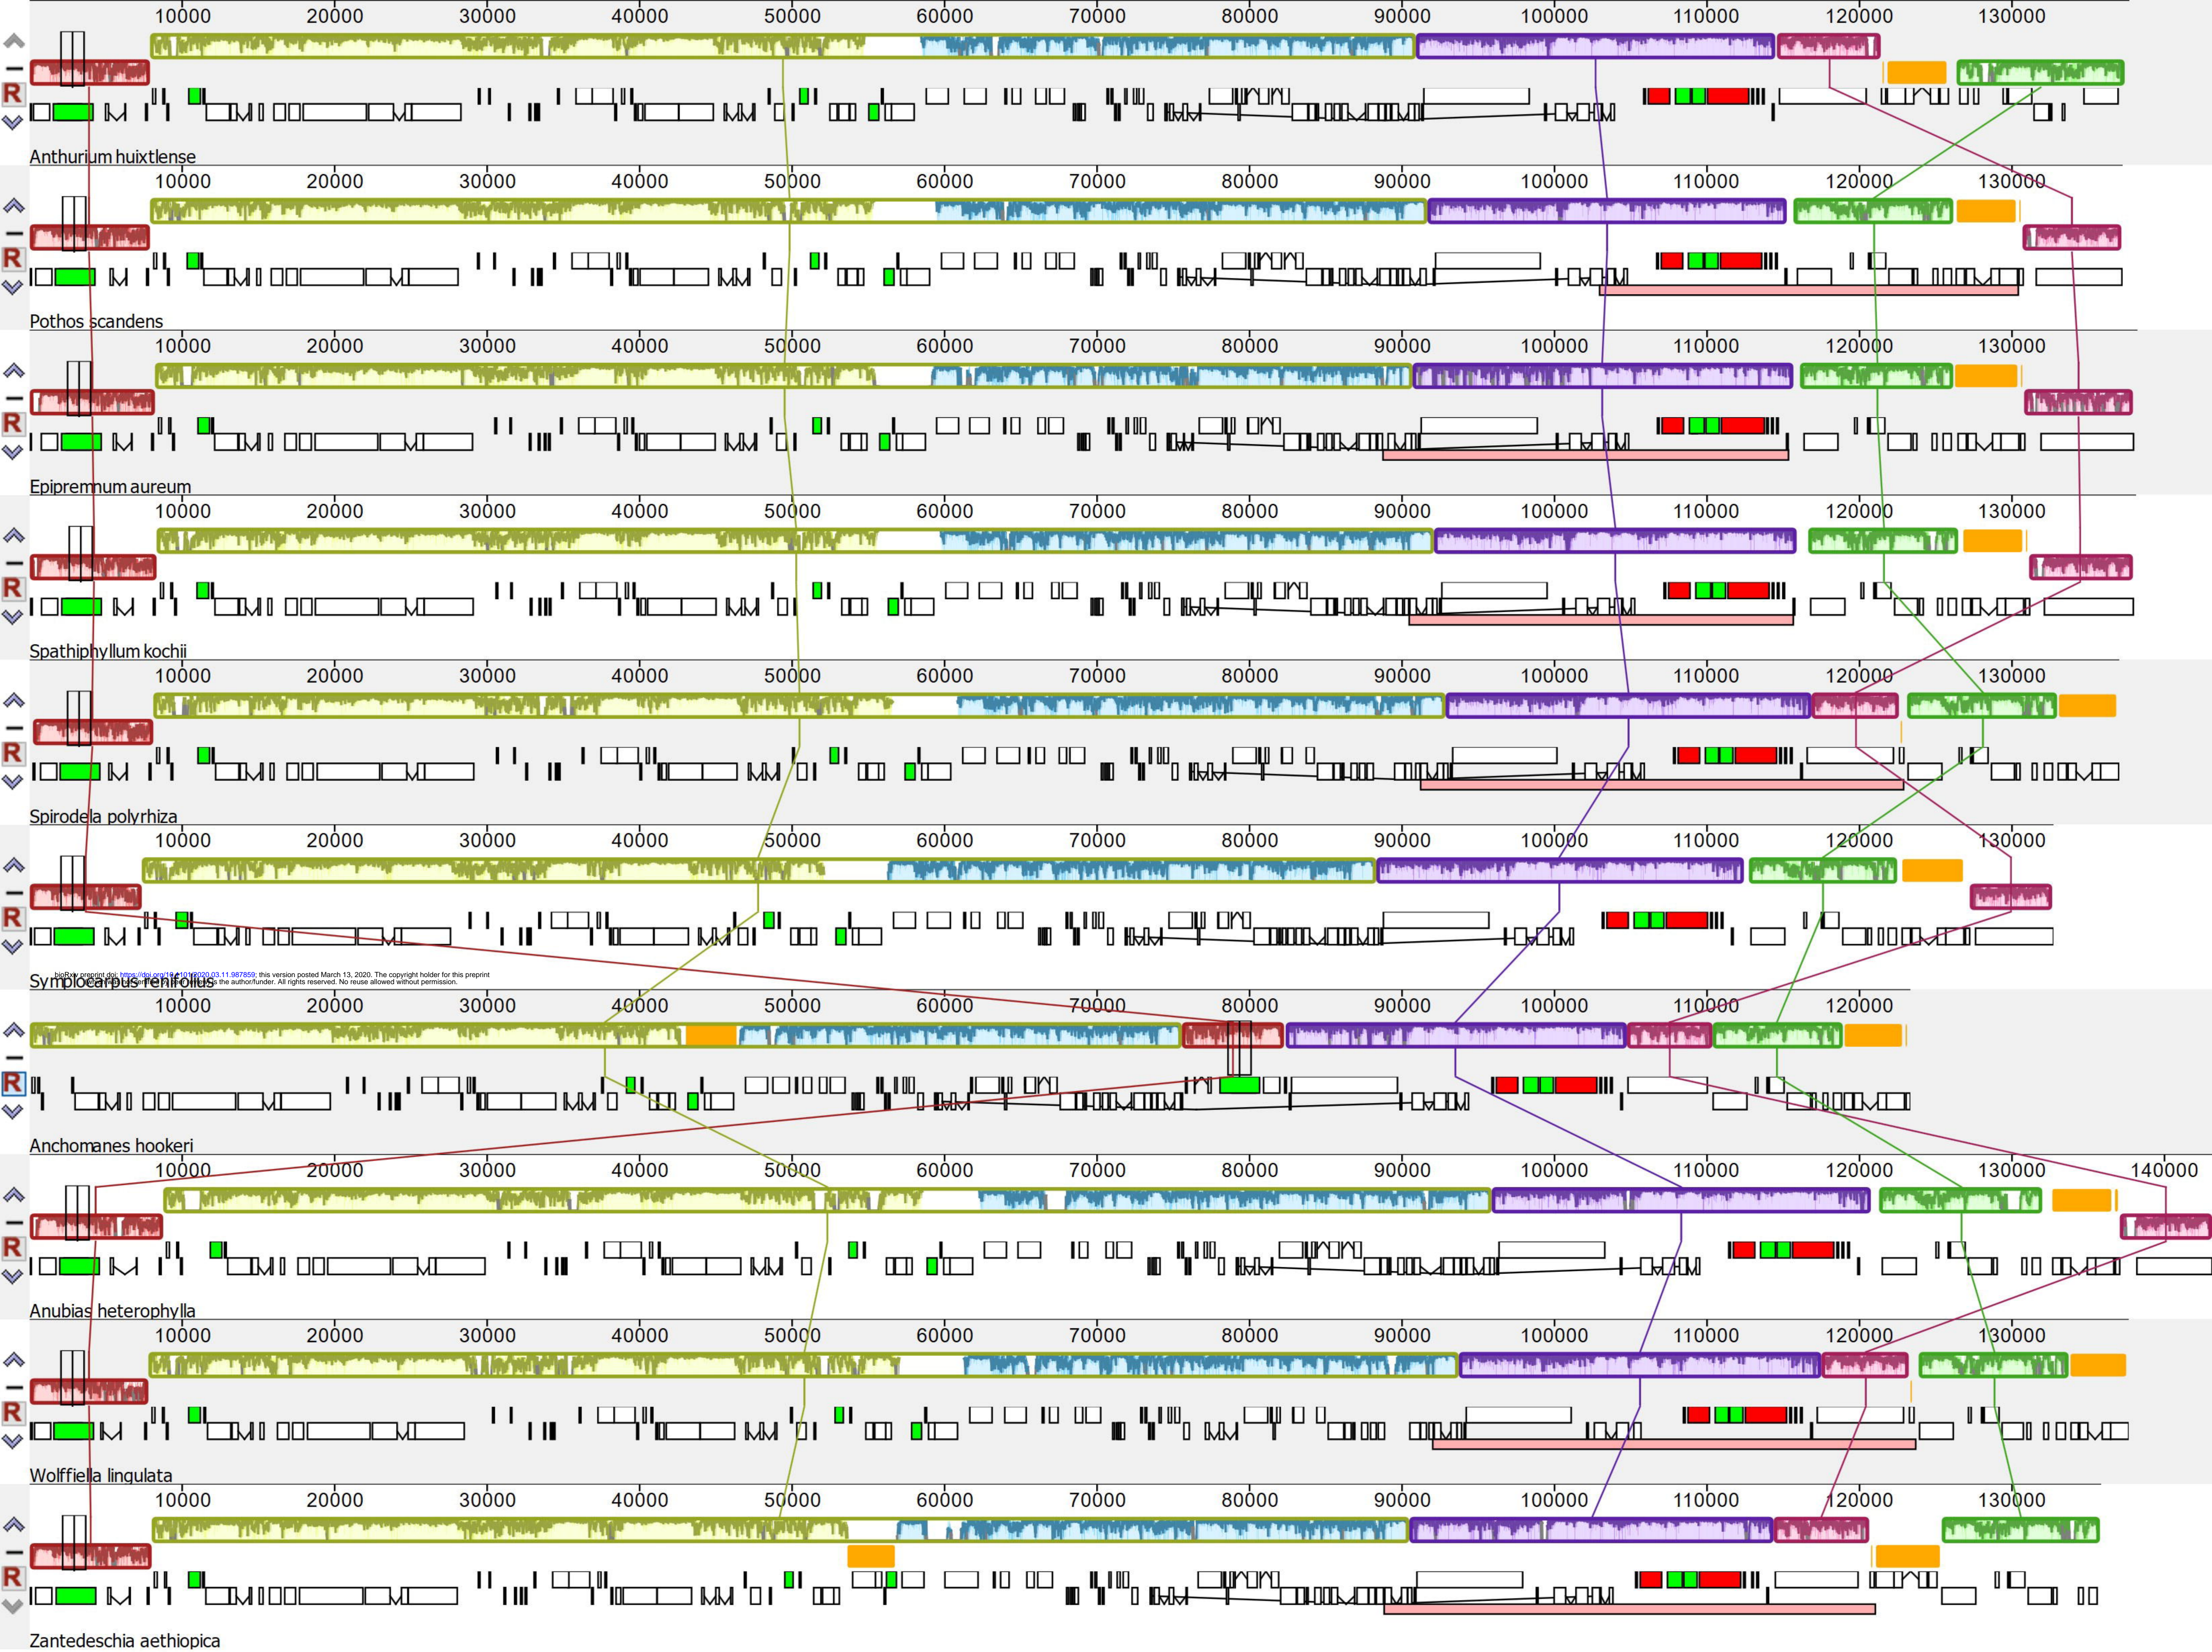

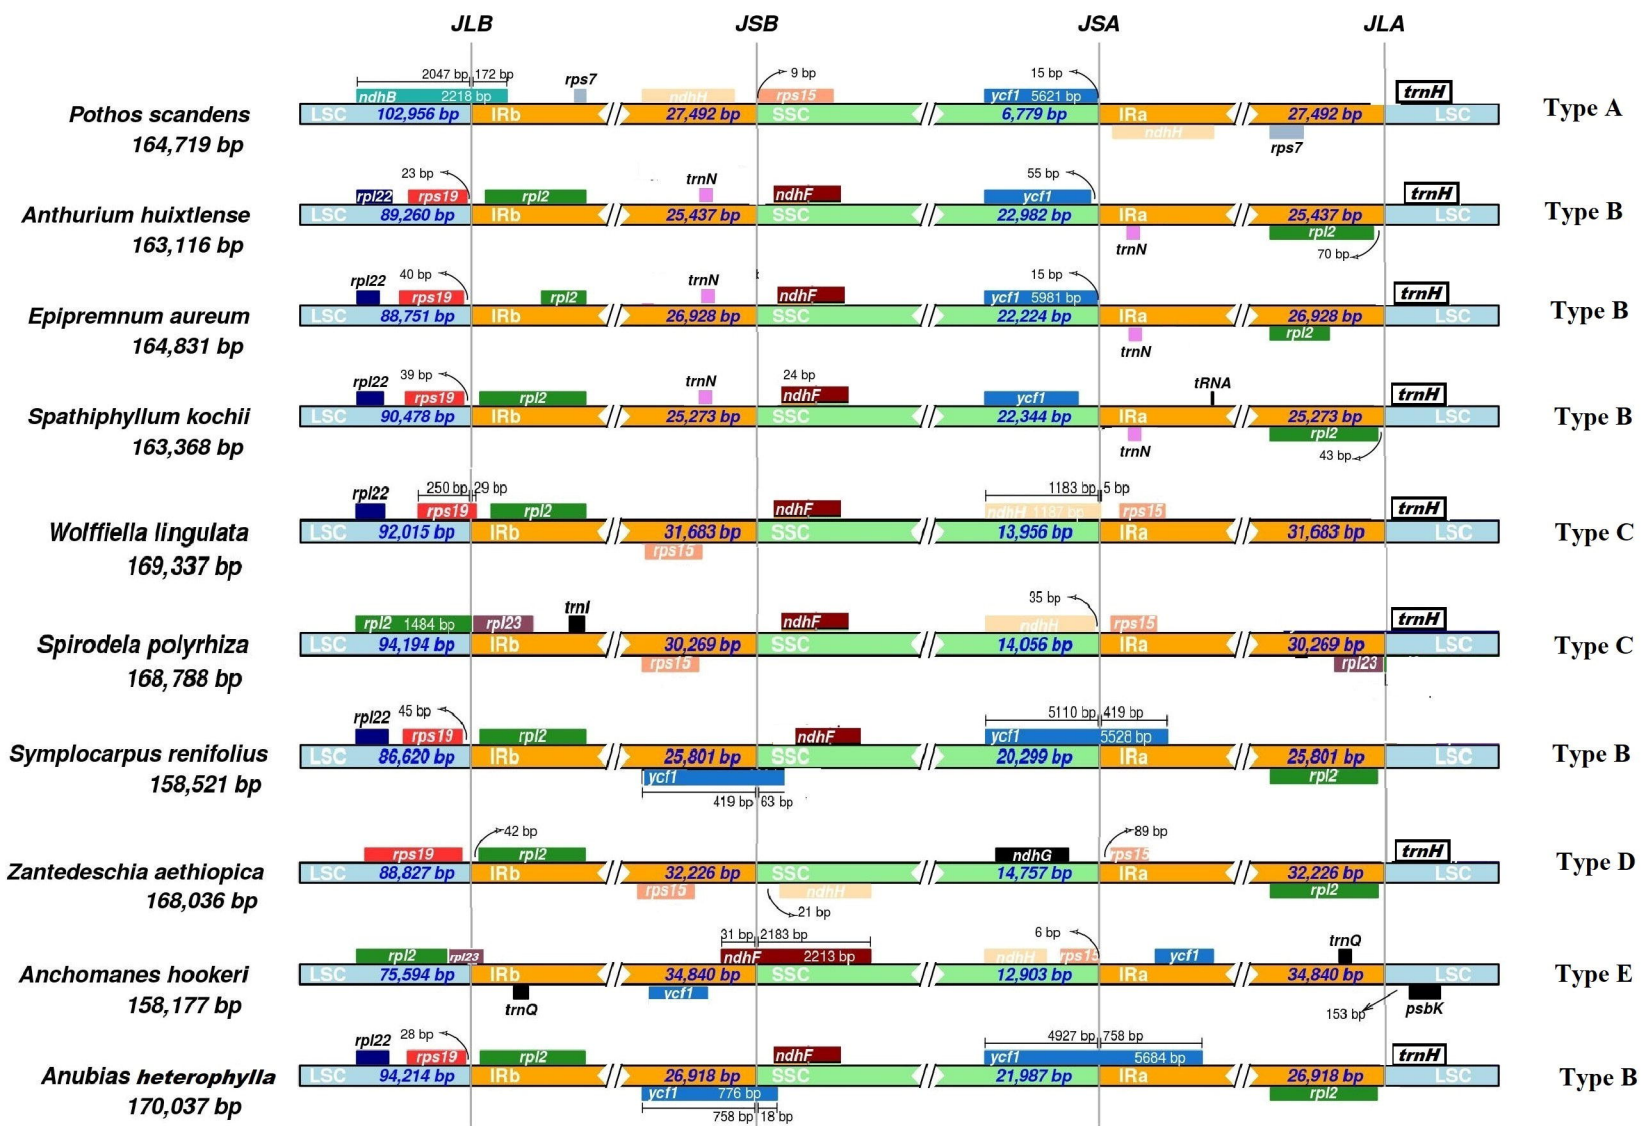

Source: https://www.biorxiv.org/content/biorxiv/early/2020/03/13/2020.03.11.987859.full.pdf
